# Supplementary material
Source: publisher site journal article supplement (https://www.dovepress.com/article/287976)
Supplement: Supplementary file 1 [file get_supplementary_file.php]

**Supplement 1** Adaptation of condensed version of the questions evaluated, and response alternatives after return.

| Question | Response alternatives |
| --- | --- |
| A. General physical activity in engaged work or daily life | 1. Sedentary, light work |
|  | 2. Light, somewhat mobile work |
|  | **3. Mobile, fairly heavy work** |
|  | **4. Heavy work** |
| B. Proportion of workday with sitting work posture in daily life | 1. A little, 10% or less |
|  | 2. About 25% of the day |
|  | 3. 50% of the day |
|  | **4. About 75% of the day** |
|  | **5. Almost all the time** |
| C. Proportion of the workday with hands above shoulder level in daily life | 1. Almost never/not at all |
| D. Proportion of workday with trunk bent in daily life | **2. About 10% or slightly less** |
|  | **3. About 25% of the day** |
|  | **4. 50% or more of the day** |
| E. Bent/twisted work posture several times per hour, in daily life | 1. Almost never/not at all |
|  | 2. 1–2 days per month |
|  | 3. One day per week |
|  | **4. 2–3 days per week** |
|  | **5. Every day** |
| F. Frequency of manual lifting (or combined with extreme forward bending) of loads 10 kg in daily life | 1. Almost never/not at all |
|  | 2. 1–10 times per day |
|  | **3. 11–50 times per day** |
|  | **4. More than 50 times per day** |
| G. Proportion of workday with repetitive movements several times per hour, in daily life | 1. A little, 10% or less |
|  | 2. About 25% of the day |
|  | **3. 50% of the day** |
|  | **4. About 75% of the day** |
|  | **5. Almost all the time** |
| H. Leisure time physical exercise/sports per week, after return | 1. Mostly physically inactive |
|  | 2. Moderate training |
|  | **3. Regular moderate training** |
|  | **4. Regular training and sports** |

**Notes:** Bolded response alternatives were arbitrarily classified as exposure to average physical load. Adapted with permission from Wolters Kluwer Health, Inc.:Leijon O, Wiktorin C, Härenstam A, Karlqvist L: Validity of a Self-administered Questionnaire for Assessing Physical Work Loads in a General Population. Journal of Occupational and Environmental Medicine. 2002;44(8):724-735.
